# Supplementary material
Source: publisher figshare collection journal article supplement (https://gsapubs.figshare.com/articles/dataset/_/23800602)
Supplement: Supplementary file 1 [file 2]

## Sheet: TABLE S1
TABLE S1 Selected microprobe analyses of garnet, amphibole, biotite, plagioclase and phengite for samples QL2105, QL2106 and QL2107.
QL2105																											QL2106																	QL2107
Minerals	Grt1	Grt1	Grt1	Grt2	Grt2	Grt2	Grt3	Grt3	Grt3	Amp-C in m	Amp-M in m	Amp-R in m	Amp in Grt	Amp in Matrix Amp	Amp-Qz	Amp-Grt	Pl-C in m	Pl-R in m	Pl-Grt	Bt in m	Bt in m	Bt in Matrix Amp	Bt in Matrix Amp	Bt-Grt	Phn in Zrn		Grt1-C	Grt1-R	Grt2-C	Grt2-R	Grt3-C	Grt3-R	Pl-C in m	Pl-R in m	Pl-Grt	Bt-C in m	Bt-M in m	Bt-R in m	Bt in Grt	Bt-Pl(Sil)	Bt-Grt	Phn in Zrn		Grt-C	Grt-R	Pl	Phn
SiO2	38.0616	38.0316	38.0632	37.8564	38.001	37.6767	37.5774	38.2666	37.7737	44.2998	44.4121	44.7139	43.848	45.0745	45.294	44.6249	46.2125	44.8794	44.7759	34.2015	35.7798	36.4215	36.1627	36.0083	48.9429		37.0097	37.337	37.2747	36.9567	37.4755	37.5453	60.3641	59.585	59.1338	36.2093	35.0237	35.0255	35.2008	34.8212	34.3413	47.2819		37.437	36.544	62.6792	48.8141
TiO2	0	0.0479	0.0795	0.1013	0.0774	0	0	0.012	0.0876	1.1781	1.7942	1.3612	1.2838	1.0807	0.9763	1.2168	0	0	0.0105	2.8822	4.2775	3.8989	3.133	3.2551	0.0847		0.0309	0	0.0273	0	0	0	0	0.0083	0.037	3.3046	4.5544	4.1556	3.9825	3.8069	3.3038	0.1404		0.0273	0.0406	0	0.7179
Al2O3	21.2721	21.199	20.9094	20.8411	21.0265	21.0317	21.3597	21.4595	21.0366	11.0447	10.8942	11.6176	11.3174	10.5987	10.3484	10.2281	34.6618	35.0912	35.3321	15.6114	15.3885	16.5681	15.3077	15.3083	30.1839		21.113	21.1436	21.2045	21.1315	21.0849	21.3542	25.9442	25.0066	25.1542	19.5473	17.93	17.7158	16.8661	17.0427	17.5639	29.0895		21.2358	20.886	23.3365	34.4383
FeO	26.8195	26.4443	28.4321	28.9477	29.1203	29.1701	28.1971	27.0649	28.8414	15.6412	15.8768	15.3782	15.0086	15.2253	14.7252	16.1431	0.0675	0.0845	0.1556	16.0269	16.3534	14.8289	15.853	15.5144	4.8585		32.7382	34.2367	34.1869	33.0778	33.6384	32.6647	0.0056	0.0056	0.0166	14.764	17.2811	15.9761	17.2858	16.0104	17.7763	4.7197		33.9913	34.6484	0.0111	1.2
MnO	0.7337	0.593	0.8252	0.9188	0.9792	0.999	0.4792	0.489	0.4169	0.0842	0.0261	0.0743	0.0765	0.0261	0.0542	0.0321	0	0	0	0	0.056	0.048	0.014	0.05	0.0304		1.1811	1.2467	1.3257	1.1765	1.1546	1.1642	0.0346	0.0041	0.0141	0.0197	0.0478	0.0158	0	0.0699	0.0538	0.0081		1.8157	3.0631	0.0261	0
MgO	3.1461	3.8338	3.0397	3.4871	3.6489	3.6776	5.0202	4.7528	4.6786	9.9108	10.16	10.0479	10.1843	10.5574	11.4225	9.7229	0	0	0.0067	13.3738	12.0456	12.694	13.4653	13.481	0.3151		4.375	4.4865	3.945	5.1153	5.1736	5.5137	0.081	0	0	9.9845	10.5121	10.4943	10.6894	10.3031	10.3491	0.3111		4.1901	2.3631	0.0056	0.9758
CaO	9.8121	9.1973	8.4319	7.3472	7.2406	7.2253	5.9314	7.2949	6.4264	11.7471	11.8335	11.4709	11.9583	12.0471	11.5403	11.6186	17.9391	18.7822	18.7876	0.1505	0.4629	0.0095	0	0.0079	0.0097		2.3953	1.3691	1.764	1.1645	1.1099	1.1411	6.052	6.8967	6.8125	0.0377	0	0.011	0	0	0.0238	0.0259		0.9077	0.8532	4.2127	0.0652
Na2O	0	0.0147	0	0.0174	0	0.01	0	0	0.0298	0.8628	0.8236	0.9609	0.7856	0.7179	0.786	0.67	1.5615	1.0383	0.8925	0.0681	0.1347	0.0898	0.0814	0.1602	0.1928		0.0125	0.0179	0.0179	0.0102	0.0254	0	7.6038	7.6848	7.674	0.0644	0.0666	0.0562	0.039	0.0618	0.0346	0.2363		0.0104	0.0289	9.597	0.203
K2O	0	0.005	0	0	0	0	0	0.0186	0	1.3254	1.2283	1.4237	1.4455	1.0817	0.9058	0.9895	0.0136	0.0442	0.0424	9.2585	9.1448	9.9614	9.4409	9.2779	8.9089		0.0233	0	0	0	0	0	0.4914	0.2366	0.314	9.4635	10.4498	10.4346	10.4666	10.2404	9.8812	10.159		0	0.0178	0.1314	11.4451
Total	99.8451	99.3666	99.781	99.517	100.094	99.7904	98.565	99.3583	99.291	96.0941	97.0488	97.0486	95.908	96.4094	96.0527	95.246	100.456	99.9198	100.003	91.5729	93.6432	94.5201	93.458	93.0631	93.5269		98.879	99.8375	99.746	98.6325	99.6623	99.3832	100.577	99.4277	99.1562	93.395	95.8655	93.8849	94.5302	92.3564	93.3278	91.9719		99.6153	98.4451	99.9996	97.8594
O	12	12	12	12	12	12	12	12	12	23	23	23	23	23	23	23	8	8	8	11	11	11	11	11	11		12	12	12	12	12	12	8	8	8	11	11	11	11	11	11	11		12	12	8	11
Si	3.00591	3.00641	3.02151	3.01293	3.00558	2.98838	2.99123	3.01399	2.99323	6.68152	6.6279	6.655	6.632	6.74519	6.71953	6.77574	2.11997	2.07641	2.06958	2.676	2.746	2.747	2.77	2.766	3.3286		2.98001	2.9857	2.99052	2.97645	2.98902	2.99227	2.67062	2.67347	2.66251	2.739	2.647	2.687	2.702	2.716	2.67	3.30624		3.00397	3.00322	2.77856	3.16259
Ti	0	0.00354985	0.0059164	0.0075584	0.00573912	0	0	0.000886085	0.00650768	0.133622	0.201358	0.152353	0.146021	0.121616	0.108919	0.138938	0	0	0.000454986	0.17	0.247	0.221	0.18	0.188	0.00540041		0.00233256	0	0.00205337	0	0	0	0	0.00034913	0.00156181	0.188	0.259	0.24	0.23	0.223	0.193	0.00920402		0.00205366	0.00312802	0	0.0436047
Al	1.97642	1.97151	1.95273	1.95142	1.9565	1.96254	2.00032	1.98849	1.96114	1.96328	1.91613	2.03787	2.01742	1.86927	1.80936	1.83033	1.87069	1.91005	1.92127	1.44	1.392	1.473	1.382	1.387	2.41506		2.00002	1.98914	2.00144	2.00224	1.97849	2.00221	1.35038	1.32	1.33244	1.743	1.597	1.602	1.526	1.567	1.61	2.39308		2.00467	2.01933	1.21706	2.62495
Fe3+	0.0117659	0.0113291	0	0.0102878	0.0208648	0.0622242	0.0172177	0	0.0439552	0.0929734	0.159531	0.139531	0.0415182	0.119229	0.465339	0.17096	0	0	0	0.103	0	0	0	0	0		0.0396403	0.0422315	0.0161978	0.0464447	0.0473817	0.0132558	0	0	0	0	0	0	0	0	0	0		0	0	0	0
Fe2+	1.75329	1.73069	1.88082	1.90963	1.89845	1.86583	1.85323	1.77643	1.86057	1.8799	1.82197	1.77458	1.8569	1.78617	1.36156	1.87889	0.00258043	0.00325793	0.00599329	0.946	1.05	0.935	1.016	0.997	0.275355		2.15709	2.23925	2.26946	2.1736	2.18843	2.15616	0.000206462	0.000209385	0.000622847	0.934	1.092	1.025	1.11	1.044	1.156	0.275025		2.2729	2.37287	0.000410051	0.0647885
Mn	0.0496661	0.0401801	0.0561476	0.0626792	0.0663831	0.0679176	0.0326959	0.033013	0.0283163	0.0107565	0.00329914	0.00936656	0.00980037	0.00330819	0.00681057	0.00412829	0	0	0	0	0.004	0.003	0.001	0.003	0.00177214		0.0815159	0.0854519	0.0911656	0.0812177	0.0789345	0.079529	0.00131209	0.000157679	0.000544161	0.001	0.003	0.001	0	0.005	0.004	0.000485487		0.12488	0.215768	0.000991722	0
Mg	0.372694	0.454594	0.361944	0.416299	0.432898	0.437542	0.599426	0.561518	0.556107	2.2284	2.26037	2.22942	2.29634	2.35522	2.52621	2.20083	0	0	0.000464519	1.559	1.378	1.427	1.537	1.544	0.0321449		0.528411	0.538152	0.474756	0.617971	0.618965	0.659142	0.00537538	0	0	1.126	1.184	1.2	1.223	1.198	1.199	0.032631		0.504324	0.291303	0.000372371	0.094831
Ca	0.830259	0.778981	0.717146	0.626519	0.613579	0.61402	0.505876	0.615609	0.545609	1.89829	1.89211	1.8292	1.93786	1.93154	1.83431	1.89013	0.881726	0.931055	0.930405	0.013	0.038	0.001	0	0.001	0.000706817		0.206645	0.117302	0.151633	0.100487	0.0948482	0.0974388	0.286877	0.331545	0.328643	0.003	0	0.001	0	0	0.002	0.00194045		0.0780368	0.0751252	0.200087	0.00452594
Na	0	0.00224911	0	0.00268033	0	0.00153516	0	0	0.00457043	0.252306	0.238306	0.277286	0.230378	0.208292	0.226081	0.197241	0.138644	0.0929775	0.0798427	0.01	0.02	0.013	0.012	0.024	0.0253786		0.00194806	0.00277044	0.00277955	0.00158999	0.00392107	0	0.651108	0.66736	0.668754	0.009	0.01	0.008	0.006	0.009	0.005	0.031981		0.00161517	0.00459684	0.823419	0.0254556
K	0	0.000504576	0	0	0	0	0	0.0018702	0	0.255024	0.233851	0.270324	0.278916	0.206505	0.171432	0.191671	0.000796457	0.00261061	0.00250182	0.924	0.895	0.959	0.923	0.909	0.77348		0.00239503	0	0	0	0	0	0.0277537	0.0135521	0.0180484	0.913	1.007	1.021	1.025	1.019	0.98	0.906867		0	0.00186743	0.00743609	0.94661
Sum	8	8	7.99621	8	8	8	8	7.99181	8	15.3961	15.3548	15.3749	15.4472	15.3463	15.2296	15.2788	5.01441	5.01636	5.01051	7.841	7.77	7.779	7.821	7.819	6.8579		8	8	8	8	8	8	4.99363	5.00664	5.01312	7.656	7.799	7.785	7.822	7.781	7.819	6.95745		7.99245	7.98721	5.02834	6.96736
X(phase)	0.175304	0.208025	0.161383	0.178982	0.185685	0.189957	0.244398	0.240176	0.230112	0.542414	0.553695	0.556798	0.552904	0.568703	0.649783	0.539456	0.86345	0.906893	0.918692	0.622355	0.567545	0.604149	0.602037	0.607635			0.196765	0.193761	0.173003	0.221371	0.220476	0.234129	0.297054	0.327466	0.323644	0.546602	0.520211	0.539326	0.524218	0.534344	0.50913			0.181593	0.109341	0.19
Y(phase)	0.28	0.26	0.24	0.21	0.2	0.21	0.17	0.2	0.18																		0.07	0.04	0.05	0.03	0.03	0.03												0.0261856	0.0254225
X(Grt)=XMg=Mg/(Fe2++Mg),Y(Grt)=Grs=Ca/(Fe2++Mg+Ca+Mn), X(Amp)=XMg=Mg/(Fe2++Mg), X(Pl)=An=Ca/(Ca+Na+K), X(Bt)=XMg=Mg/(Fe2++Mg), -C, -M and -R refer to core, mantle and rim of the related minerals; in m refers to minerals in matrix; in Amp, Grt,and Zrn refer to the mineral inclusions in amphibole, garnet and zircon; -Grt and -Pl(Sil) refer to minerals around garnet and plagioclase or sillimanite; A…

## Sheet: TABLE S2
TABLE S2 Zircon U-Pb isotopic and age data as well as trace element compositions of zircons of samples QL2105, QL2106 and QL2107
Spots	Isotope ratios							Corrected ages (Ma)							Th(ppm)	U(ppm)	Th/U	Ti(ppm)	La(ppm)	Ce(ppm)	Pr(ppm)	Nd(ppm)	Sm(ppm)	Eu(ppm)	Gd(ppm)	Tb(ppm)	Dy(ppm)	Ho(ppm)	Er(ppm)	Tm(ppm)	Yb(ppm)	Lu(ppm)
	207Pb/206Pb	1δ	207Pb/235U	1δ	206Pb/238U	1δ		207Pb/206Pb	1δ	207Pb/235U	1δ	206Pb/238U	1δ
QL2105-01	0.0567162	0.00194517	0.620181	0.0195648	0.0786896	0.00175023		479.67	43.515	489.961	12.262	488.296	10.4597		1.9496	150.391	0.0129635	2.83162	0.00468436	0.421791	0.00487988	0.124067	0.562194	0.709573	4.95065	1.0128	5.33106	0.986096	3.47884	0.537784	5.21402	0.709121
QL2105-02	0.0550849	0.000370314	0.502525	0.00936688	0.0648788	0.00107582		416.715	17.59	413.41	6.33007	405.228	6.51264		134.164	4858.82	0.0276124	4.14204	0.132866	2.25575	0.0709825	0.500334	0.467378	0.426234	3.31742	1.46018	19.659	7.57494	39.4843	8.22924	95.7092	17.4803
QL2105-03	0.0567236	0.000999705	0.640347	0.0135355	0.0808605	0.00130039		479.67	38.885	502.521	8.3787	501.257	7.75574		1.67928	317.877	0.0052828	2.40447	0.00133983	0.657436	0.0058801	0.124601	1.17484	1.42606	11.0952	2.03992	10.4714	1.88128	5.68911	0.800178	6.5521	1.01214
QL2105-04	0.0579613	0.00115905	0.646861	0.0177422	0.0795317	0.00156302		527.815	44.44	506.545	10.9395	493.327	9.33355		10.6306	294.197	0.0361343	4.59169	0.0500066	0.700959	0.0101007	0.117727	0.540665	0.518859	3.91098	0.771018	5.39778	1.37419	6.01274	1.13665	12.1872	2.13652
QL2105-05	0.0541096	0.00040914	0.486318	0.00642619	0.0641858	0.000920585		375.98	12.035	402.399	4.3901	401.031	5.57654		34.1002	1350.2	0.0252556	3.45144	1.72834	3.83657	0.327852	1.13033	0.393388	0.126443	2.21092	0.78539	9.64812	3.71514	19.468	3.90519	47.3936	9.19618
QL2105-06	0.0576383	0.000690665	0.589487	0.0108515	0.0730477	0.00134002		516.705	21.295	470.54	6.93217	454.491	8.05026		11.3956	583.285	0.0195369	20.0659	0.0905731	1.14201	0.0638824	0.453902	0.401887	0.334102	1.20139	0.353523	3.94469	1.30045	6.00798	1.06713	12.8975	2.58566
QL2105-07	0.0577375	0.00201093	0.640284	0.0257703	0.0801504	0.00195922		520.41	75.915	502.482	15.9539	497.02	11.6928		3.63655	258.637	0.0140604	4.40697	0.00126506	0.575622	0.00549392	0.103165	0.662893	0.760258	5.15703	1.05451	7.15658	1.83934	7.25647	1.18398	13.0157	2.22498
QL2105-08	0.0587198	0.00144337	0.660683	0.0170671	0.0808076	0.0011974		566.7	53.695	515.032	10.4356	500.941	7.14185		2.13568	158.554	0.0134698	5.04303	0.028544	0.623072	0.0126062	0.0950118	0.332504	0.426894	2.81833	0.507707	3.53067	0.897442	3.14577	0.507507	5.12002	0.662221
QL2105-09	0.0573284	0.00045536	0.645496	0.0108525	0.0809851	0.00129064		505.595	16.665	505.703	6.69686	502	7.69666		7.71726	462.609	0.016682	3.09447	0.00126506	0.575622	0.00549392	0.103165	0.662893	0.760258	5.15703	1.05451	7.15658	1.83934	7.25647	1.18398	13.0157	2.22498
QL2105-10	0.0569544	0.00160118	0.629347	0.0184921	0.0794228	0.00135885		500.04	61.105	495.689	11.5245	492.676	8.11516		2.51339	268.307	0.00936758	2.16845	0.040859	0.642522	0.0243066	0.131912	1.09669	1.27853	9.64134	1.76314	10.2243	2.21255	7.68328	1.125	10.7617	1.76814
QL2105-11	0.058044	0.00171279	0.649063	0.0216496	0.080491	0.00186951		531.52	64.805	507.902	13.3311	499.053	11.1539		1.89501	230.169	0.00823314	3.57139	0.00401168	0.660987	0.00730897	0.263241	1.30006	1.24194	8.43791	1.62443	10.2306	2.22911	7.00406	1.09038	9.53364	1.44226
QL2105-12	0.0546309	0.00119324	0.554203	0.016436	0.0717796	0.00225458		398.2	54.625	447.746	10.7382	446.868	13.5606		7.65203	178.939	0.0427633	3.31619	0.0181951	0.532659	0.0103583	0.0506311	0.261438	0.269738	2.14821	0.693128	5.71351	1.54869	5.53548	1.16927	10.8919	2.20471
QL2105-13	0.0553836	0.000701733	0.499867	0.0121273	0.0642274	0.00170057		427.825	29.625	411.612	8.21013	401.283	10.301		176.182	1920.28	0.0917483	6.86967	1.61039	9.27724	1.13028	8.21973	5.16493	1.40807	22.4945	8.10148	122.855	56.9513	333.597	75.5969	903.284	162.011
QL2105-14	0.0564093	0.000674994	0.513828	0.0116954	0.0634074	0.00130015		477.82	25.9225	421.02	7.84468	396.315	7.88157		13.2566	1617.67	0.00819487	9.82603	0.171138	2.16735	0.278768	2.07995	1.2594	0.563446	2.92027	0.835782	11.3808	5.05128	29.24	6.982	97.215	21.4053
QL2105-15	0.0554512	0.00204719	0.637774	0.0255712	0.0797538	0.00182585		431.53	81.475	500.927	15.8549	494.653	10.9008		0.885274	152.793	0.00579395	2.33455	0.00332691	0.347897	0.00724417	0.0415953	0.583929	0.640603	4.06537	0.791769	5.18801	1.083	3.66255	0.518697	4.85509	0.687977
QL2105-16	0.0560587	0.000575714	0.517684	0.0118962	0.0641976	0.00132393		453.75	22.22	423.603	7.95911	401.103	8.01976		9.12681	1258.85	0.00725012	2.27162	0.00688377	0.597365	0.00125054	0.0645435	0.130804	0.092557	1.43506	0.617374	9.35108	4.51788	27.3732	6.7127	90.987	20.8573
QL2105-17	0.0560127	0.00157439	0.565281	0.0177368	0.0710186	0.00139803		453.75	65.735	454.958	11.5062	442.289	8.41466		6.91644	176.477	0.0391918	5.52638	0.00210241	0.321648	0	0.0262811	0.02006	0.0494196	0.376696	0.190116	2.4962	1.10697	6.84395	1.58014	19.277	4.06201
QL2105-18	0.0598405	0.00128053	0.674368	0.0161701	0.0796409	0.00121894		598.17	46.2875	523.365	9.80631	493.979	7.27814		3.87418	229.155	0.0169064	2.79614	0.00921405	0.626906	0.00479083	0.139855	0.843259	1.07529	7.33304	1.3607	8.83751	2.02548	7.46706	1.2276	11.8678	2.04166
QL2105-19	0.0591082	0.000838539	0.600936	0.011109	0.071936	0.000997383		572.255	36.1025	477.828	7.04595	447.809	5.99807		63.8401	775.209	0.0823522	9.48942	0.11482	1.06672	0.0378522	0.360584	0.500701	0.377113	2.71221	0.634369	8.73079	2.90825	14.824	3.21651	38.1633	7.62033
QL2105-20	0.0578766	0.00141146	0.641417	0.0173691	0.0790373	0.00127694		524.11	51.8475	503.183	10.7449	490.374	7.62875		5.57255	221.794	0.0251249	2.73558	0.0270013	0.932213	0.0157782	0.4271	1.45533	1.44947	11.2646	2.25561	12.7628	2.72618	8.0843	1.19199	10.571	1.56416
QL2105-21	0.0587974	0.000933544	0.661061	0.0123513	0.080495	0.00121394		561.145	35.18	515.263	7.55034	499.077	7.24256		3.95876	227.521	0.0173996	2.31123	0.0153028	0.545366	0.00654993	0.132986	0.766274	0.734145	5.43471	1.02177	5.92458	1.15857	3.4646	0.525406	4.72611	0.655661
QL2105-22	0.0582116	0.00143768	0.651888	0.0176777	0.0809765	0.00179226		538.925	53.6975	509.64	10.8665	501.949	10.6882		1.82523	313.672	0.00581893	2.80399	0.0111157	0.673685	0.0122294	0.116767	0.591155	0.703784	4.72552	0.900755	5.73045	1.21134	3.67946	0.518566	5.07001	0.72306
QL2105-23	0.0608193	0.00158963	0.675191	0.0222458	0.0796738	0.00190297		631.5	55.545	523.864	13.4846	494.176	11.3621		7.62707	225.595	0.0338087	3.74009	0.157729	0.724429	0.0368338	0.228811	0.822556	0.98576	7.20727	1.56779	9.24422	1.87031	6.03726	0.947078	9.95121	1.55783
QL2105-24	0.0580653	0.00113522	0.514006	0.0147748	0.0632921	0.00149205		531.52	44.44	421.14	9.90919	395.616	9.04582		177.828	1574.61	0.112935	28.1034	0.213954	2.54791	0.0905248	1.10986	0.369929	0.312024	2.41244	0.942246	11.2274	4.21612	20.9703	4.15617	49.2893	9.07904
QL2106-01	0.0563558	0.000530861	0.655259	0.0103321	0.0811421	0.00121288		464.86	15.74	511.71	6.33809	502.936	7.23192		13.8797	2249.38	0.00617045	5.62169	1.33484	10.9982	1.94689	14.9045	8.91021	5.40286	21.5181	5.73335	47.3208	10.0431	32.3333	4.89686	44.1851	6.44931
QL2106-02	0.0560117	0.000659386	0.532602	0.00838214	0.0642838	0.000737801		453.75	25.9225	433.535	5.55341	401.625	4.46889		28.2908	72.8295	0.388453	2.74527	0	6.77993	0.0028844	0.0499954	0.209731	0.137673	3.17129	1.35882	20.531	8.95459	49.4389	11.2092	142.209	30.5894
QL2106-03	0.0677613	0.000526273	1.32723	0.0177074	0.130893	0.00109824		861.105	10.96	857.673	7.72597	792.959	6.26028		121.219	260.902	0.464616	3.98208	0.0137733	3.34666	0.100147	3.28169	8.83789	0.576621	55.8041	17.9697	218.445	80.801	358.141	66.7241	699.348	118.415
QL2106-04	0.0617273	0.00196128	0.718419	0.0295048	0.0799395	0.00279735		664.83	68.51	549.733	17.4356	495.762	16.6981		22.3638	519.634	0.0430377	2.74261	10.5597	16.6243	4.73743	7.96375	2.43004	0.391794	15.1096	5.63806	46.8609	10.8968	35.2	6.04956	55.5479	9.36393
QL2106-05	0.0652078	0.00041565	1.04445	0.0151336	0.112257	0.00132942		781.17	12.9625	726.129	7.51631	685.841	7.70507		38.3425	1361.97	0.0281522	5.56393	0.155694	1.21115	0.177559	1.51114	3.22075	0.529463	26.0911	12.0177	157.297	55.2306	263.311	52.1989	554.629	93.5051
QL2106-06	0.0624551	0.00155626	0.720033	0.026519	0.0810618	0.00201729		700.01	53.7	550.686	15.6561	502.457	12.0292		45.4773	396.265	0.114765	5.00437	85.3436	165.171	18.1672	92.1279	20.0358	1.62361	20.671	5.41785	52.1178	11.979	36.2976	4.6631	41.4909	6.30177
QL2106-07	0.0567083	0.001033	0.650617	0.0151207	0.0815856	0.00134753		479.67	40.7375	508.859	9.30184	505.58	8.03149		9.65312	728.447	0.0132516	2.72782	0.0110661	0.254676	0.0112572	0.221666	1.52142	0.177081	15.9941	7.52429	75.7383	13.9149	31.5357	3.43689	25.2984	3.36326
QL2106-08	0.0563802	0.000628994	0.615222	0.00920949	0.0721576	0.000546154		477.82	28.7	486.848	5.78946	449.141	3.28378		6.07068	763.376	0.00795241	5.14875	0.177328	0.902914	0.0989788	0.627173	0.953897	0.474977	9.56262	5.38719	78.5886	25.6117	95.4049	15.2315	133.7	19.3331
QL2106-09	0.05885	0.000591535	0.546082	0.0104796	0.0661507	0.000916821		561.145	22.2175	442.427	6.88256	412.923	5.5435		102.019	932.613	0.109391	7.52946	42.3123	99.2673	12.2019	53.2705	14.6233	0.568365	26.698	6.06859	61.624	18.0382	77.3113	16.3188	185.389	32.9671
QL2106-10	0.0522237	0.000624568	0.564775	0.00956325	0.0726767	0.000711726		294.505	-4.63	454.63	6.20568	452.262	4.27723		8.54182	1204.41	0.00709212	15.7619	4.64693	9.8597	1.14218	4.59622	1.46522	0.286929	6.75046	3.09541	39.3138	13.5945	58.2743	10.9773	115.273	18.6841
QL2106-11	0.0574584	0.000499076	0.713298	0.0206397	0.0808972	0.00195523		509.3	13.8875	546.703	12.2327	501.476	11.6609		13.9343	336.005	0.0414704	5.82609	13.3657	25.5395	4.13276	11.7783	5.46248	0.245955	16.1584	5.81229	53.1094	11.4988	31.4315	3.96792	28.6748	3.51781
QL2106-12	0.0631078	0.000820411	1.20005	0.0218409	0.124107	0.00142907		722.23	27.775	800.61	10.0805	754.159	8.19531		88.1513	185.302	0.475717	4.51748	0.0159858	26.1089	0.0462982	1.13652	2.06102	0.509327	12.9983	4.52035	59.9057	24.0224	120.348	24.8054	300.129	52.7873
QL2106-13	0.062202	0.000702812	1.18746	0.0309534	0.123857	0.00253743		679.64	24.0725	794.781	14.369	752.728	14.5547		207.19	367.601	0.563628	10.2891	0.0285649	12.0838	0.139678	2.75536	6.40632	1.47586	41.4005	14.758	195.198	74.7618	353.294	65.2291	662.584	111.288
QL2106-14	0.0668531	0.000573929	1.27935	0.0193155	0.12502	0.0014051		833.02	16.665	836.563	8.60471	759.394	8.0513		55.5398	174.815	0.317705	6.83546	0.128694	9.73341	0.175408	1.83388	2.89882	0.43524	16.5782	6.11851	80.206	30.5813	151.4	31.0812	337.657	59.0775
QL2106-15	0.0534821	0.000434852	0.517637	0.00707327	0.0643003	0.000610855		350.055	18.515	423.572	4.73244	401.725	3.69992		12.6196	625.24	0.0201836	4.54229	0.0566404	0.40048	0.0367776	0.502556	1.0096	0.145181	9.6886	4.42715	49.1135	14.9782	62.434	12.1663	133.252	22.6175
QL2106-16	0.0683106	0.000881168	1.31242	0.0214216	0.128314	0.00125876		879.63	27.78	851.19	9.4065	778.242	7.1917		78.2856	546.518	0.143244	4.84286	0.342415	8.57199	0.26946	2.57989	2.89312	1.01924	14.6153	5.85558	87.4507	34.361	176.564	37.1893	437.019	77.568
QL2106-17	0.0545194	0.000845182	0.544749	0.00951007	0.0712248	0.000584657		390.79	30.5525	441.551	6.25117	443.531	3.51835		10.9075	883.663	0.0123435	12.216	1.03515	5.14104	0.431811	1.25921	0.921828	0.230784	8.26845	4.46083	65.727	21.7405	84.5664	12.8223	106.058	14.4583
QL2106-18	0.0632531	0.00250769	1.24782	0.0383553	0.131885	0.00202905		716.675	83.325	822.421	17.3275	798.611	11.556		79.0439	357.262	0.221249	4.14997	0.0197064	2.00092	0.0573868	1.33447	3.10062	0.256184	27.4857	10.0525	130.479	47.6133	228.885	42.8933	441.991	75.0056
QL2106-19	0.0655543	0.000831588	1.23433	0.0192455	0.132875	0.00125957		792.28	27.775	816.308	8.74625	804.246	7.16734		106.105	266.642	0.397931	6.18125	2.50928	22.2424	0.67911	4.15843	3.25534	0.859773	15.8809	5.12185	64.6362	24.8236	128.537	27.4111	316.883	59.0904
QL2106-20	0.0631872	0.000629372	1.19371	0.0184183	0.131494	0.00148853		714.51	24.9975	797.677	8.52534	796.382	8.48053		71.9412	160.494	0.44825	2.8686	0.0114299	43.2469	0.0469474	0.947651	2.92439	0.905329	16.2246	5.23663	65.8548	23.706	119.992	25.2714	277.284	49.0901
QL2106-21	0.067922	0.000555476	1.04484	0.0111006	0.109663	0.000947266		866.35	16.6675	726.326	5.51214	670.792	5.50299		80.4935	665.986	0.120864	3.95262	0.0830196	5.34857	0.130926	1.53407	2.26492	0.628113	13.3396	5.70764	83.8053	33.9952	184.706	40.7069	479.969	87.0028
QL2106-22	0.0669559	0.00139985	1.20764	0.0280722	0.129024	0.00410402		835.18	43.675	804.104	12.9123	782.293	23.4329		67.0641	496.045	0.135198	44.891	0.0140975	2.59805	0.0922021	1.37998	3.01644	0.53761	14.9109	4.67458	58.6817	21.8949	111.28	22.9004	271.994	48.1277
QL2106-23	0.0537775	0.000901019	0.561087	0.0178014	0.0726949	0.00128667		361.165	37.035	452.234	11.5791	452.371	7.73233		15.7159	1634.89	0.00961283	10.7403	10.3235	25.1303	3.08073	14.9356	5.62016	1.83565	15.6839	5.0432	51.0768	13.4259	49.987	8.62762	85.0615	13.7738
QL2107-01	0.0586269	0.00112397	0.5768	0.0180431	0.0718416	0.00222468		553.74	42.585	462.403	11.6194	447.241	13.38		7.76718	5206.19	0.00149191	6.39922	0.00328387	0.453685	0.00235184	0.0609594	1.04158	0.743046	13.1887	4.85999	52.5697	12.6298	41.0281	5.68912	49.0267	6.89065
QL2107-02	0.0590031	0.00120907	0.600611	0.0353966	0.0739961	0.00453269		568.55	46.285	477.622	22.4583	460.186	27.2066		3.26502	5306.19	0.000615322	7.28134	0.821936	3.64131	0.544455	4.11072	1.64769	0.611417	6.72258	2.35033	19.6529	3.99529	9.96593	1.21576	11.3778	1.5152
QL2107-03	0.0584105	0.00218139	0.563509	0.0227459	0.0726293	0.00336098		546.33	86.0975	453.808	14.7728	451.977	20.1993		2.84144	3420.67	0.000830669	6.99458	0.0364063	0.450208	0.0327569	0.310296	0.690961	0.573244	8.13224	4.301	58.306	16.1059	50.9407	7.25398	62.7692	9.08243
QL2107-04	0.0582201	0.00116994	0.576415	0.0209402	0.0724774	0.0026277		538.925	47.215	462.155	13.4886	451.064	15.7946		6.86736	6409.83	0.00107138	9.17898	0.0202789	0.45428	0.0221497	0.313632	1.34037	0.858164	13.6732	5.27811	50.8291	9.86181	28.2093	3.94575	35.7494	4.57978
QL2107-05	0.0582879	0.00104192	0.509406	0.00936134	0.0642328	0.00134617		538.925	43.5125	418.05	6.29749	401.316	8.15422		136.302	8436.95	0.0161554	11.3195	3.49692	29.1794	5.272	35.1975	28.0732	4.37347	84.5413	26.8902	227.661	40.3285	96.3501	11.3321	82.8052	10.07
QL2107-06	0.0586434	0.00181421	0.492744	0.00854281	0.0626645	0.00118297		553.74	68.5075	406.778	5.81099	391.81	7.17621		189.186	11165.8	0.0169433	10.4879	2.46664	20.2989	3.1339	19.6055	18.2857	3.09228	81.1432	27.3517	228.464	38.3546	82.7939	8.67644	57.6673	6.60659
QL2107-07	0.0617896	0.00166072	0.536122	0.0437611	0.0625243	0.00343027		733.34	57.4	435.864	28.9341	390.959	20.8118		1071.6	10301.6	0.104022	8.57314	19.2059	154.155	27.1078	181.984	80.4385	16.7311	123.838	28.6081	284.213	84.132	360.963	67.8385	685.07	103.587
QL2107-08	0.0594466	0.0016546	0.575383	0.0155461	0.0719125	0.00211635		583.36	61.1	461.49	10.0203	447.668	12.7276		5.8278	4818.43	0.00120948	5.30058	0.10949	1.45958	0.0532024	0.546446	0.647262	0.585283	5.83477	2.18533	17.4779	3.48684	9.87383	1.27641	10.1654	1.27064
QL2107-09	0.0597877	0.00247394	0.582485	0.0347129	0.0726644	0.00484765		594.47	90.7275	466.057	22.2767	452.188	29.1332		3.26672	4181.71	0.000781192	4.52871	0.471355	4.41702	0.6973	3.42914	2.83535	1.27634	12.1827	5.35813	64.9624	18.0485	63.5651	9.91426	93.5933	13.5015
QL2107-10	0.0584464	0.00221537	0.571107	0.0417112	0.0720383	0.00511973		546.33	83.32	458.73	26.9637	448.424	30.7864		12.3348	7672.76	0.00160761	6.44327	0.00722601	0.96219	0.0260192	0.133983	0.615017	0.518292	7.60339	2.56837	22.3879	4.58677	12.6382	1.82683	15.4179	2.18603
QL2107-11	0.0590163	0.00212397	0.587984	0.0391888	0.0720403	0.00456257		568.55	77.765	469.579	25.0631	448.436	27.4359		10.119	8610.06	0.00117525	13.4178	0.0473773	0.525992	0.0346653	0	0.44737	0.587049	8.71385	3.04775	24.8152	4.92311	13.7851	2.34902	18.0206	2.12673
QL2107-12	0.058982	0.00243189	0.572806	0.0254772	0.071893	0.00369556		564.85	90.7275	459.828	16.4492	447.55	22.2254		3.9561	6936.47	0.000570334	10.072	0.531286	5.04539	1.04814	3.77539	3.26521	1.74928	12.4682	5.78357	76.2235	20.1278	60.4329	7.7544	61.3116	6.96868
QL2107-13	0.0598316	0.00179432	0.584138	0.025613	0.0726292	0.00424995		598.17	64.8025	467.117	16.4186	451.977	25.542		7.82912	9699.44	0.000807173	7.80697	0.159486	1.44158	0	0	1.57942	0.691866	4.94428	3.20439	56.694	12.2234	29.8227	2.44523	24.5149	3.33966
QL2107-14	0.0612457	0.000993644	0.597967	0.0139096	0.0715095	0.00189621		655.57	35.1825	475.942	8.83872	445.243	11.408		25.5966	19419.8	0.00131807	24.5299	20.507	146.637	23.0649	148.909	66.4283	16.1797	95.829	16.3678	110.297	22.0916	59.8506	7.06001	52.6483	7.64292
QL2107-15	0.0608821	0.00238904	0.566958	0.0249539	0.0702337	0.00343042		635.2	83.32	456.045	16.1714	437.564	20.6628		6.48876	7499.02	0.000865282	6.83626	0.401345	3.5669	0.57202	3.71721	1.80015	0.682593	7.351	3.62408	46.3214	13.1034	43.8178	6.15457	52.111	7.3426
QL2107-16	0.05767	0.00143275	0.548055	0.0187097	0.0707058	0.00300117		516.705	55.55	443.722	12.2725	440.407	18.0692		21.5546	9777.24	0.00220457	9.78105	0.989669	5.4178	0.771296	4.13419	2.92469	1.36121	10.4988	3.45345	33.1505	8.79942	31.2584	5.44601	50.0674	6.5659
QL2107-17	0.0581828	0.000601676	0.573407	0.00645504	0.0714127	0.000731116		600.025	22.22	460.216	4.16572	444.661	4.39894		20.0563	8388.32	0.00239098	5.06279	0.840873	4.67193	0.560515	3.78705	2.43742	0.848368	10.7122	3.49324	34.7341	8.36956	26.8092	4.07079	34.934	4.77332
QL2107-18	0.0575321	0.000529445	0.568292	0.0105785	0.0721903	0.00150992		522.26	15.74	456.909	6.84907	449.338	9.07819		5.86826	7200.47	0.000814983	6.90411	0.00290965	0.369325	0	0.10796	0.645479	0.556579	6.65182	2.35832	20.2878	4.07265	12.6824	1.9616	16.753	2.16121
QL2107-19	0.059441	0.00250478	0.50347	0.0267047	0.0634096	0.00387953		583.36	86.0975	414.049	18.0372	396.328	23.5179		259.242	9545.98	0.0271572	16.2161	0.214386	3.91064	0.148576	1.721	4.65169	0.460312	49.8051	19.9681	198.356	46.7721	156.639	25.888	245.77	36.1683
QL2107-20	0.0726079	0.0139802	0.519697	0.0197184	0.0640279	0.00268507		1002.77	398.9	424.949	13.1756	400.075	16.2675		2697.7	14794.5	0.182345	10.0204	13.3869	80.9509	8.48774	37.9951	21.2888	8.54951	101.552	35.4224	430.146	146.636	650.579	118.502	1200.89	186.001
1δ refers to 1 sigma of standard deviation.
